# Supplementary material for: Impact of cognitive impairment on clinical outcomes in elderly patients with atrial fibrillation: ANAFIE Registry
Source: HighWire-hosted journal article supplement (doi:10.1136/bmjno-2022-000370), 2023-01-01
Supplement: bmjno-2022-000370supp001_data_supplement.pdf [file bmjno-2022-000370supp001_data_supplement.pdf]

## Impact of cognitive impairment on clinical outcomes in elderly patients with atrial fibrillation: ANAFIE Registry

Ken Nagata,<sup>1</sup> Hiroshi Inoue,<sup>2</sup> Takeshi Yamashita,<sup>3</sup> Masaharu Akao,<sup>4</sup> Hirotsugu Atarashi,<sup>5</sup> Takanori Ikeda,<sup>6</sup> Yukihiro Koretsune,<sup>7</sup> Ken Okumura,<sup>8</sup> Wataru Shimizu,<sup>9</sup> Shinya Suzuki,<sup>3</sup> Hiroyuki Tsutsui,<sup>10</sup> Kazunori Toyoda,<sup>11</sup> Atsushi Hirayama,<sup>12</sup> Takenori Yamaguchi,<sup>11</sup>; Satoshi Teramukai,<sup>13</sup> Tetsuya Kimura,<sup>14</sup> Yoshiyuki Morishima,<sup>14</sup> Atsushi Takita,<sup>15</sup> Masahiro Yasaka,<sup>16</sup>

<sup>1</sup>Clinical Research Institute, Yokohama General Hospital, Yokohama, Japan

<sup>2</sup>Saiseikai Toyama Hospital, Toyama, Japan.

<sup>3</sup>The Cardiovascular Institute, Tokyo, Japan.

<sup>4</sup>Department of Cardiology, National Hospital Organization Kyoto Medical Center, Kyoto, Japan.

<sup>5</sup>AOI Hachioji Hospital, Tokyo, Japan.

<sup>6</sup>Department of Cardiovascular Medicine, Toho University Faculty of Medicine, Tokyo, Japan.

<sup>7</sup>National Hospital Organization Osaka National Hospital, Osaka, Japan.

<sup>8</sup>Division of Cardiology, Saiseikai Kumamoto Hospital Cardiovascular Center, Kumamoto, Japan.

<sup>9</sup>Department of Cardiovascular Medicine, Graduate School of Medicine, Nippon Medical School, Tokyo, Japan.

<sup>10</sup>Department of Cardiovascular Medicine, Faculty of Medical Sciences, Kyushu University, Fukuoka, Japan.

<sup>11</sup>Department of Cerebrovascular Medicine, National Cerebral and Cardiovascular Center, Osaka, Japan.

<sup>12</sup>Osaka Police Hospital, Osaka, Japan.

<sup>13</sup>Department of Biostatistics, Graduate School of Medical Science, Kyoto Prefectural University of Medicine, Kyoto, Japan.

<sup>14</sup>Primary Medical Science Department, Daiichi Sankyo Co., Ltd., Tokyo, Japan.

<sup>15</sup>Data Intelligence Department, Daiichi Sankyo Co., Ltd., Tokyo, Japan.

<sup>16</sup>Department of Cerebrovascular Medicine and Neurology, National Hospital Organization Kyushu Medical Center, Fukuoka, Japan

**Corresponding author**

Ken Nagata

Clinical Research Institute, Yokohama General Hospital,  
2201-5 Kuroganecho, Akobaku, Yokohama, 225-00025, Japan

Tel: +81-459020001

Fax: +81-455226299

E-mail: [nagata@yokoso.or.jp](mailto:nagata@yokoso.or.jp)

**Table S1** Changes in MMSE scores over 2 years

|                                       | <b>Normal cognition (MMSE <math>\geq 24</math>)<br/>n=2377</b> | <b>Cognitive impairment (MMSE <math>\leq 23</math>)<br/>n=586</b> | <b>Total<br/>n=2963</b> | <b>p value*</b> |
|---------------------------------------|----------------------------------------------------------------|-------------------------------------------------------------------|-------------------------|-----------------|
| Number of repeated MMSE determination | 1611 (67.8)                                                    | 304 (51.9)                                                        | 1915 (64.6)             | <0.001          |
| MMSE score decrease >2 points         | 526 (22.1)                                                     | 116 (19.8)                                                        | 642 (21.7)              | 0.062           |
| Change in MMSE score                  | -1.2 $\pm$ 3.6                                                 | -0.4 $\pm$ 5.2                                                    | -1.1 $\pm$ 3.9          | 0.001           |

Data are n (%) or mean  $\pm$  standard deviation.

\*Normal cognition vs. cognitive impairment group.

MMSE, Mini-Mental State Examination.

**Table S2** Risk factors for cardiovascular death

| Item                                                                    | N                                                         | Event (%) |    |        | Univariate  |              |       | Multivariate* |              |       |
|-------------------------------------------------------------------------|-----------------------------------------------------------|-----------|----|--------|-------------|--------------|-------|---------------|--------------|-------|
|                                                                         |                                                           |           |    |        | HR (95% CI) | P value      |       | HR (95% CI)   | P value      |       |
| Educational background                                                  | <9 years                                                  | 1109      | 25 | (2.25) | 1.34        | (0.79, 2.28) | 0.271 | 1.06          | (0.56, 2.00) | 0.855 |
|                                                                         | ≥9 years†                                                 | 1822      | 31 | (1.70) |             | -            |       |               | -            |       |
| Volunteer activities                                                    | Nearly daily/ several times a week/once a week† or less   | 577       | 10 | (1.73) |             | -            |       |               | -            |       |
|                                                                         | Not at all                                                | 2378      | 48 | (2.02) | 1.20        | (0.61, 2.37) | 0.599 | 0.63          | (0.26, 1.57) | 0.326 |
| Employed                                                                | Nearly daily/several times a week†                        | 605       | 9  | (1.49) |             | -            |       |               | -            |       |
|                                                                         | Not more than once a week                                 | 2272      | 44 | (1.94) | 1.33        | (0.65, 2.72) | 0.436 | 0.77          | (0.35, 1.66) | 0.499 |
| Participation in neighborhood associations and resident associations    | Almost always/sometimes†                                  | 1432      | 18 | (1.26) |             | -            |       |               | -            |       |
|                                                                         | Low participation/not interested                          | 1523      | 40 | (2.63) | 2.20        | (1.26, 3.83) | 0.006 | 1.10          | (0.54, 2.23) | 0.795 |
| Participation in learning activities such as open lectures for citizens | Participating/participated in the past†                   | 1174      | 16 | (1.36) |             | -            |       |               | -            |       |
|                                                                         | No participation                                          | 1776      | 41 | (2.31) | 1.73        | (0.97, 3.08) | 0.064 | 1.45          | (0.69, 3.03) | 0.325 |
| Driving status                                                          | Currently driver/previous driver/an inexperienced driver† | 1818      | 28 | (1.54) |             | -            |       |               | -            |       |
|                                                                         | No driver's license                                       | 1128      | 30 | (2.66) | 1.77        | (1.06, 2.96) | 0.030 | 2.49          | (1.11, 5.58) | 0.027 |
|                                                                         | Used†                                                     | 1809      | 29 | (1.60) |             | -            |       |               | -            |       |

|                                                          |                                                             |      |    |        |      |               |        |      |              |       |
|----------------------------------------------------------|-------------------------------------------------------------|------|----|--------|------|---------------|--------|------|--------------|-------|
| Mobile telephone use                                     | Not used                                                    | 1102 | 29 | (2.63) | 1.70 | (1.02, 2.85)  | 0.043  | 0.76 | (0.38, 1.53) | 0.447 |
| Frequency of calls (fixed-line phones and mobile phones) | Nearly daily/several times a week†                          | 2095 | 32 | (1.53) |      | -             |        |      | -            |       |
|                                                          | Less than once a week/rarely used                           | 862  | 26 | (3.02) | 2.05 | (1.22, 3.44)  | 0.007  | 1.27 | (0.62, 2.59) | 0.518 |
| Computer use                                             | Daily/occasional use†                                       | 558  | 8  | (1.43) |      | -             |        |      | -            |       |
|                                                          | Little use/no interest                                      | 2393 | 50 | (2.09) | 1.52 | (0.72, 3.20)  | 0.272  | 0.68 | (0.19, 2.41) | 0.555 |
| Internet use                                             | Daily/occasional use†                                       | 445  | 6  | (1.35) |      | -             |        |      | -            |       |
|                                                          | Little use/no interest                                      | 2505 | 51 | (2.04) | 1.58 | (0.68, 3.67)  | 0.293  | 1.03 | (0.26, 4.08) | 0.970 |
| Going out                                                | Nearly daily/several times a week†                          | 2427 | 38 | (1.57) |      | -             |        |      | -            |       |
|                                                          | Less than once a week/rarely go out                         | 531  | 20 | (3.77) | 2.60 | (1.51, 4.46)  | <0.001 | 1.25 | (0.59, 2.68) | 0.558 |
| Main means of going out                                  | Public transportation†                                      | 644  | 13 | (2.02) |      | -             |        |      | -            |       |
|                                                          | Private car (driving oneself, driven by a household member) | 1586 | 33 | (2.08) | 1.03 | (0.54, 1.96)  | 0.921  | 1.04 | (0.49, 2.21) | 0.919 |
|                                                          | Other                                                       | 428  | 9  | (2.10) | 1.06 | (0.45, 2.47)  | 0.899  | 0.88 | (0.36, 2.18) | 0.788 |
| Shopping                                                 | Almost every day†                                           | 618  | 5  | (0.81) |      | -             |        |      | -            |       |
|                                                          | Several times a week                                        | 1255 | 18 | (1.43) | 1.79 | (0.67, 4.83)  | 0.249  | 1.51 | (0.54, 4.22) | 0.431 |
|                                                          | Less than once a week/rarely go out                         | 1082 | 35 | (3.23) | 4.22 | (1.65, 10.78) | 0.003  | 1.50 | (0.49, 4.59) | 0.479 |
| Monetary management (bank accounts and pensions)         | Self-managed†                                               | 1989 | 28 | (1.41) |      | -             |        |      | -            |       |
|                                                          | Managed by relatives/others                                 | 942  | 30 | (3.18) | 2.40 | (1.43, 4.01)  | <0.001 | 1.15 | (0.57, 2.31) | 0.691 |

|                                                |                                                           |      |    |        |      |              |        |      |              |       |
|------------------------------------------------|-----------------------------------------------------------|------|----|--------|------|--------------|--------|------|--------------|-------|
| Travel and business trips to other prefectures | Monthly, several times a year, not more than once a year† | 1497 | 19 | (1.27) |      | -            |        |      | -            |       |
|                                                | Little travel                                             | 1458 | 39 | (2.67) | 2.20 | (1.27, 3.81) | 0.005  | 1.32 | (0.62, 2.79) | 0.468 |
| Exercise habits                                | None                                                      | 1081 | 34 | (3.15) | 2.44 | (1.44, 4.11) | <0.001 | 1.54 | (0.80, 2.96) | 0.195 |
|                                                | Other†                                                    | 1784 | 24 | (1.35) |      | -            |        |      | -            |       |
| Use of long-term care services                 | None                                                      | 2385 | 37 | (1.55) | 0.38 | (0.22, 0.66) | <0.001 | 0.72 | (0.35, 1.49) | 0.376 |
|                                                | Other†                                                    | 538  | 20 | (3.72) |      | -            |        |      | -            |       |
| Sex                                            | Male†                                                     | 1657 | 34 | (2.05) |      | -            |        |      | -            |       |
|                                                | Female                                                    | 1306 | 24 | (1.84) | 0.90 | (0.53, 1.51) | 0.686  | 0.31 | (0.14, 0.70) | 0.005 |
| Age                                            | <85 years†                                                | 2216 | 33 | (1.49) |      | -            |        |      | -            |       |
|                                                | ≥85 years                                                 | 747  | 25 | (3.35) | 2.38 | (1.41, 4.00) | 0.001  | 0.91 | (0.45, 1.82) | 0.789 |
| BMI (kg/m <sup>2</sup> )                       | <18.5                                                     | 178  | 10 | (5.62) | 3.18 | (1.55, 6.50) | 0.002  | 2.14 | (0.89, 5.16) | 0.090 |
|                                                | ≥18.5 to <25.0†                                           | 1641 | 30 | (1.83) |      | -            |        |      | -            |       |
|                                                | ≥25.0                                                     | 775  | 11 | (1.42) | 0.76 | (0.38, 1.52) | 0.445  | 1.00 | (0.45, 2.22) | 0.994 |
| Anticoagulants                                 | Warfarin†                                                 | 685  | 19 | (2.77) |      | -            |        |      | -            |       |
|                                                | None                                                      | 228  | 5  | (2.19) | 0.79 | (0.29, 2.10) | 0.632  | 1.04 | (0.33, 3.27) | 0.945 |
|                                                | DOAC                                                      | 2050 | 34 | (1.66) | 0.59 | (0.34, 1.04) | 0.066  | 0.77 | (0.40, 1.50) | 0.442 |
| Hypertension                                   | Systolic BP <130 mmHg†                                    | 1382 | 34 | (2.46) |      | -            |        |      | -            |       |
|                                                | Systolic BP ≥130 mmHg to <140 mmHg                        | 696  | 10 | (1.44) | 0.57 | (0.28, 1.16) | 0.124  | 0.64 | (0.29, 1.43) | 0.280 |
|                                                | Systolic BP ≥140 mmHg                                     | 655  | 9  | (1.37) | 0.55 | (0.26, 1.15) | 0.111  | 0.62 | (0.27, 1.44) | 0.264 |
| Diabetes mellitus                              | Presence (HbA1c: <6.0%)                                   | 88   | 2  | (2.27) | 1.10 | (0.27, 4.55) | 0.892  | 0.63 | (0.08, 4.73) | 0.652 |
|                                                | Presence (HbA1c: ≥6.0%)                                   | 513  | 9  | (1.75) | 0.85 | (0.42, 1.74) | 0.664  | 0.71 | (0.31, 1.63) | 0.418 |
|                                                | None†                                                     | 2234 | 46 | (2.06) |      | -            |        |      | -            |       |

|                                                                     |                                              |      |    |        |      |               |        |      |              |       |
|---------------------------------------------------------------------|----------------------------------------------|------|----|--------|------|---------------|--------|------|--------------|-------|
| Heart disease: heart failure, left ventricular systolic dysfunction | Yes                                          | 976  | 27 | (2.77) | 1.84 | (1.10, 3.08)  | 0.021  | 1.36 | (0.74, 2.50) | 0.326 |
|                                                                     | None†                                        | 1987 | 31 | (1.56) |      | -             |        |      | -            |       |
| Cerebrovascular disorders                                           | Yes                                          | 754  | 20 | (2.65) | 1.62 | (0.94, 2.78)  | 0.082  | 1.88 | (1.01, 3.51) | 0.047 |
|                                                                     | None†                                        | 2209 | 38 | (1.72) |      | -             |        |      | -            |       |
| Creatinine clearance                                                | <30 mL/min/severe renal dysfunction/dialysis | 337  | 18 | (5.34) | 7.85 | (3.41, 18.05) | <0.001 | 3.34 | (1.12, 9.97) | 0.031 |
|                                                                     | 30 mL/min to <50 mL/min                      | 953  | 23 | (2.41) | 3.34 | (1.49, 7.47)  | 0.003  | 2.97 | (1.26, 7.01) | 0.013 |
|                                                                     | ≥50 mL/min†                                  | 1076 | 8  | (0.74) |      | -             |        |      | -            |       |

\*All of the items listed in the column were included in the model.

†Reference

BMI, body mass index; BP, blood pressure; CI, confidence interval; DOAC, direct oral anticoagulant; HbA1c, glycated hemoglobin; HR, hazard ratio.

**Table S3** Risk factors for all-cause death

| Item                                                                    | N                                                                   | Event (%) |     |        | Univariate  |              |             | Multivariate* |              |       |
|-------------------------------------------------------------------------|---------------------------------------------------------------------|-----------|-----|--------|-------------|--------------|-------------|---------------|--------------|-------|
|                                                                         |                                                                     |           |     |        | HR (95% CI) | P value      | HR (95% CI) | P value       |              |       |
| Educational background                                                  | <9 years                                                            | 1109      | 90  | (8.12) | 1.35        | (1.02, 1.78) | 0.035       | 1.11          | (0.80, 1.55) | 0.518 |
|                                                                         | ≥9 years†                                                           | 1822      | 111 | (6.09) |             | -            |             |               | -            |       |
| Volunteer activities                                                    | Nearly daily/several times a week/ once a week† or less             | 577       | 26  | (4.51) |             | -            |             |               | -            |       |
|                                                                         | Not at all                                                          | 2378      | 178 | (7.49) | 1.71        | (1.13, 2.58) | 0.010       | 0.91          | (0.55, 1.50) | 0.698 |
| Employed                                                                | Nearly daily/several times a week†                                  | 605       | 22  | (3.64) |             | -            |             |               | -            |       |
|                                                                         | Not more than once a week                                           | 2272      | 172 | (7.57) | 2.14        | (1.37, 3.33) | <0.001      | 1.28          | (0.79, 2.08) | 0.320 |
| Participation in neighborhood associations and resident associations    | Almost always/sometimes†                                            | 1432      | 58  | (4.05) |             | -            |             |               | -            |       |
|                                                                         | Low participation/not interested                                    | 1523      | 145 | (9.52) | 2.47        | (1.82, 3.35) | <0.001      | 1.36          | (0.93, 2.00) | 0.118 |
| Participation in learning activities such as open lectures for citizens | Participating/having participated in the past†                      | 1174      | 64  | (5.45) |             | -            |             |               | -            |       |
|                                                                         | Do not participate                                                  | 1776      | 139 | (7.83) | 1.47        | (1.09, 1.97) | 0.011       | 0.71          | (0.50, 1.01) | 0.057 |
| Driving status                                                          | Currently driver/previous driver operation/an inexperienced driver† | 1818      | 105 | (5.78) |             | -            |             |               | -            |       |



|                                                          |                                                             |      |     |         |      |              |        |      |              |       |
|----------------------------------------------------------|-------------------------------------------------------------|------|-----|---------|------|--------------|--------|------|--------------|-------|
|                                                          | No driver's license                                         | 1128 | 98  | (8.69)  | 1.54 | (1.17, 2.03) | 0.002  | 1.69 | (1.10, 2.60) | 0.016 |
| Mobile telephone use                                     | Used†                                                       | 1809 | 94  | (5.20)  |      | -            |        |      | -            |       |
|                                                          | Not used                                                    | 1102 | 109 | (9.89)  | 1.97 | (1.50, 2.60) | <0.001 | 0.85 | (0.59, 1.22) | 0.373 |
| Frequency of calls (fixed-line phones and mobile phones) | Nearly daily/several times a week†                          | 2095 | 113 | (5.39)  |      | -            |        |      | -            |       |
|                                                          | Less than once a week/rarely used                           | 862  | 91  | (10.56) | 2.03 | (1.54, 2.67) | <0.001 | 0.97 | (0.67, 1.42) | 0.893 |
| Computer use                                             | Daily/occasional use†                                       | 558  | 16  | (2.87)  |      | -            |        |      | -            |       |
|                                                          | Little use/no interest                                      | 2393 | 187 | (7.81)  | 2.84 | (1.70, 4.73) | <0.001 | 1.29 | (0.59, 2.82) | 0.530 |
| Internet use                                             | Daily/occasional use†                                       | 445  | 12  | (2.70)  |      | -            |        |      | -            |       |
|                                                          | Little use/no interest                                      | 2505 | 190 | (7.58)  | 2.93 | (1.63, 5.25) | <0.001 | 1.38 | (0.57, 3.34) | 0.474 |
| Going out                                                | Nearly daily/several times a week†                          | 2427 | 133 | (5.48)  |      | -            |        |      | -            |       |
|                                                          | Less than once a week/rarely go out                         | 531  | 71  | (13.37) | 2.63 | (1.97, 3.51) | <0.001 | 1.17 | (0.79, 1.75) | 0.433 |
| Main means of going out                                  | Public transportation†                                      | 644  | 43  | (6.68)  |      | -            |        |      | -            |       |
|                                                          | Private car (driving oneself, driven by a household member) | 1586 | 113 | (7.12)  | 1.07 | (0.75, 1.51) | 0.724  | 1.10 | (0.73, 1.66) | 0.635 |
|                                                          | Other                                                       | 428  | 36  | (8.41)  | 1.28 | (0.82, 1.99) | 0.273  | 0.93 | (0.56, 1.53) | 0.768 |
| Shopping                                                 | Almost every day†                                           | 618  | 19  | (3.07)  |      | -            |        |      | -            |       |
|                                                          | Several times a week                                        | 1255 | 64  | (5.10)  | 1.68 | (1.00, 2.80) | 0.048  | 1.43 | (0.82, 2.48) | 0.205 |

|                                                  |                                                           |      |     |         |      |              |        |      |              |        |
|--------------------------------------------------|-----------------------------------------------------------|------|-----|---------|------|--------------|--------|------|--------------|--------|
|                                                  | Less than once a week/rarely go out                       | 1082 | 121 | (11.18) | 3.84 | (2.37, 6.23) | <0.001 | 1.37 | (0.75, 2.50) | 0.302  |
| Monetary management (bank accounts and pensions) | Self-managed†                                             | 1989 | 85  | (4.27)  |      | -            |        |      | -            |        |
|                                                  | Managed by a family member/others                         | 942  | 118 | (12.53) | 3.11 | (2.35, 4.11) | <0.001 | 1.54 | (1.07, 2.21) | 0.020  |
| Travel and business trips to other prefectures   | Monthly, several times a year, not more than once a year† | 1497 | 62  | (4.14)  |      | -            |        |      | -            |        |
|                                                  | Little travel                                             | 1458 | 142 | (9.74)  | 2.45 | (1.82, 3.31) | <0.001 | 1.24 | (0.84, 1.83) | 0.270  |
| Exercise habits                                  | None                                                      | 1081 | 112 | (10.36) | 2.21 | (1.67, 2.92) | <0.001 | 1.21 | (0.86, 1.71) | 0.275  |
|                                                  | Other†                                                    | 1784 | 87  | (4.88)  |      | -            |        |      | -            |        |
| Use of long-term care services                   | None                                                      | 2385 | 127 | (5.32)  | 0.37 | (0.28, 0.50) | <0.001 | 0.73 | (0.49, 1.06) | 0.101  |
|                                                  | Other†                                                    | 538  | 71  | (13.20) |      | -            |        |      | -            |        |
| Sex                                              | Male†                                                     | 1657 | 125 | (7.54)  |      | -            |        |      | -            |        |
|                                                  | Female                                                    | 1306 | 79  | (6.05)  | 0.80 | (0.61, 1.07) | 0.131  | 0.42 | (0.27, 0.65) | <0.001 |
| Age                                              | <85 years†                                                | 2216 | 121 | (5.46)  |      | -            |        |      | -            |        |
|                                                  | ≥85 years                                                 | 747  | 83  | (11.11) | 2.16 | (1.63, 2.85) | <0.001 | 1.18 | (0.82, 1.69) | 0.382  |
| BMI (kg/m <sup>2</sup> )                         | <18.5                                                     | 178  | 23  | (12.92) | 1.94 | (1.24, 3.04) | 0.004  | 1.66 | (0.99, 2.78) | 0.054  |
|                                                  | ≥18.5 to <25.0†                                           | 1641 | 113 | (6.89)  |      | -            |        |      | -            |        |
|                                                  | ≥25.0                                                     | 775  | 39  | (5.03)  | 0.72 | (0.50, 1.03) | 0.076  | 0.95 | (0.62, 1.45) | 0.818  |
| Anticoagulants                                   | Warfarin†                                                 | 685  | 57  | (8.32)  |      | -            |        |      | -            |        |
|                                                  | None                                                      | 228  | 17  | (7.46)  | 0.89 | (0.52, 1.53) | 0.670  | 1.15 | (0.63, 2.08) | 0.656  |
|                                                  | DOAC                                                      | 2050 | 130 | (6.34)  | 0.75 | (0.55, 1.03) | 0.072  | 0.88 | (0.62, 1.26) | 0.488  |
| Hypertension                                     | Systolic BP <130 mmHg†                                    | 1382 | 120 | (8.68)  |      | -            |        |      | -            |        |
|                                                  | Systolic BP ≥130 mmHg to <140 mmHg                        | 696  | 39  | (5.60)  | 0.64 | (0.44, 0.91) | 0.014  | 0.75 | (0.51, 1.13) | 0.169  |

|                                                                     |                                                 |      |     |         |      |              |           |      |              |       |
|---------------------------------------------------------------------|-------------------------------------------------|------|-----|---------|------|--------------|-----------|------|--------------|-------|
|                                                                     | Systolic BP $\geq$ 140 mmHg                     | 655  | 36  | (5.50)  | 0.62 | (0.43, 0.90) | 0.013     | 0.74 | (0.49, 1.13) | 0.166 |
| Diabetes mellitus                                                   | Presence (HbA1c: $<$ 6.0%)                      | 88   | 6   | (6.82)  | 0.97 | (0.43, 2.20) | 0.948     | 0.56 | (0.18, 1.78) | 0.328 |
|                                                                     | Presence (HbA1c: $\geq$ 6.0%)                   | 513  | 31  | (6.04)  | 0.86 | (0.59, 1.27) | 0.447     | 0.82 | (0.53, 1.27) | 0.380 |
|                                                                     | None <sup>†</sup>                               | 2234 | 157 | (7.03)  |      | -            |           |      | -            |       |
| Heart disease: heart failure, left ventricular systolic dysfunction | Yes                                             | 976  | 92  | (9.43)  | 1.74 | (1.32, 2.29) | $<$ 0.001 | 1.21 | (0.88, 1.68) | 0.242 |
|                                                                     | None <sup>†</sup>                               | 1987 | 112 | (5.64)  |      | -            |           |      | -            |       |
| Cerebrovascular disorders                                           | Yes                                             | 754  | 77  | (10.21) | 1.86 | (1.40, 2.46) | $<$ 0.001 | 1.63 | (1.17, 2.27) | 0.004 |
|                                                                     | None <sup>†</sup>                               | 2209 | 127 | (5.75)  |      | -            |           |      | -            |       |
| Creatinine clearance                                                | $<$ 30 mL/min/severe renal dysfunction/dialysis | 337  | 55  | (16.32) | 4.58 | (3.07, 6.85) | $<$ 0.001 | 2.30 | (1.34, 3.96) | 0.003 |
|                                                                     | 30 mL/min to $<$ 50 mL/min                      | 953  | 62  | (6.51)  | 1.71 | (1.16, 2.54) | 0.007     | 1.34 | (0.86, 2.10) | 0.197 |
|                                                                     | $\geq$ 50 mL/min <sup>†</sup>                   | 1076 | 42  | (3.90)  |      | -            |           |      | -            |       |

\*All of the items listed in the column were included in the model.

<sup>†</sup>Reference

BMI, body mass index; BP, blood pressure; CI, confidence interval; DOAC, direct oral anticoagulant; HbA1c, glycated hemoglobin; HR, hazard ratio.
